# Supplementary material
Source: MDPI journal article supplement (https://www.mdpi.com/2071-1050/13/15/8656)
Supplement: s1 [file s1]

Archive with 2 entries (2 files):
- Supplementary Material S1_Coherence Panels of Indicators.xlsx
- Supplementary Material S2_DELPHI Questionnaire.pdf
