# Supplementary material
Source: MDPI journal article supplement (https://www.mdpi.com/2071-1050/13/15/8656)
Supplement: s1 [file s1 › Supplementary Material S1_Coherence Panels of Indicators.xlsx]

## Sheet: Table2_CE Obj & CECA Coherence
	CECA	Resource Use Efficiency		Waste Reduction & Circular Activities
	CE OBJECTIVES	1	Minimize use of material and inputs	4	Maximize rates of materials reuse, recycling and recovery
		2	Minimize global energy consumption	5	Prevent waste production
		3	Reduce water consumption and use	6	Eliminate and dispose waste in such a way that they don't endanger human health and ecosystems
				7	Minimize food waste and feed loss
	CECA	Energy and Greenhouse gas Emissions		Complementary Indicators (Social aspects & Biodiversity)
	CE OBJECTIVES	8	Maximize the use of renewable (sustainable) energy	12	Ensure a decent work environment (sanitary facilities, safe and ergonomic work environment, etc.)
		9	Reduce greenhouse gas emissions	13	Support local economy through employment and added value creation
		10	Prevent emissions of pollutants and air contaminants	14	Protect animals from hunger, thirst, injury and disease
		11	Eliminate ozone-depleting substances	15	Keep animals in conditions adapted to their species and without discomfort, pain, fear and distress

## Sheet: Table3_Coherence Analysis_CECA1
	CECA: RESSOURCE USE EFFICIENCY
		Performance indicators developed for the CECA								Unit of measurement
		PI 1	Laying rate							Percentage (%)
		PI 2	Duration of the production cycle							Weeks
		PI 3	Variability of the duration of the downtime period							Percentage (%)
		PI 4	Food conversion rate							Kilogram of feed / kilogram produced egg
		PI 5	Share of food that is wasted in farm's operations. Of this percentage, what part is recovered or reused?							Percentage (%)
		PI 6	Quantity of fresh water used							Liters/tonne egg produced
		PI 7	Stategy for responsible wastewater management							Indicator of Good Practices (IgP)
		PI 8	Intensity use (in terms of cost) of material and other disposables							Dollars ($)/dozen egg produced
		PI 9	Renewal rate of light production equipment (cages, feeder and waterers, scraping pads, etc.)							Percentage (%)
		PI 10	Share of packaging material used that re made of biodegradable matter							Percentage (%)
		PI 11	Total (quantity of) energy used							Kilowatts-hour(kWh)/dozen egg produced
		PI 12	Strategies to reduce energy consumption							Indicator of Good Practices (IgP)
	COHERENCE PANEL
	CE Objectives	CO 1	Minimize use of material and inputs	**	**	**	**	*	**	*	**	**	*	**	*
		CO 2	Minimize global energy consumption		*	*							**		**
		CO 3	Reduce water consumption and use		*	*		**		**
		Performance Indicators		PI 1	PI 2	PI 3	PI 4	PI 5	PI 6	PI 7	PI 8	PI 9	PI 10	PI 11	PI 12
	Decesion Variables	DV 1	Hens’ productivity	**	**	**	**		**
		DV 2	Feed utilization		*	*	**		**
		DV 3	Water use/consumption		*	*		**		**
		DV 4	Use of prodution equipment & other disposables		*	*					**	**		**
		DV 5	Energy use		*	*							**		**
		DV 6	Reduction and disposition of mortalities
		DV 7	Spent hens’ valorization
		DV 8	Reduction and disposition of downgraded eggs
		DV 9	Manure production and management
		DV 10	Use of renewable energy										*		*
		DV 11	Greenhouse gas emissions									*	*	*	*
		DV 12	Occupational health and safety
		DV 13	Local employment and wealth
		DV 14	Animal welfare
	LEGEND
		CECA:	Category of Economic Circularity Assessment			DV :	Decision Variable
		CO :	Circularity Obejctive (For the level of Decision Centres)			DC.:	Decision Centre
		** :	Strong link * : Weak link			Blank box :			No link

## Sheet: S1-a_Coherence_CECA 2
	CECA : WASTE REDUCTION & CIRCULAR ACTIVITIES
		Peformance indicators developed for the CECA							Unit of Measurement
		PI 13	Hens’ viability rate (100 - mortality rate)						Percentage (%)
		PI 14	Share of unsold eggs (dirty, without weight, broken) that are recovered on farm						Percentage (%)
		PI 15	Share of downgraded eggs that are revalorized						Percentage (%)
		PI 16	Share of mortalities valorized through rendering						Percentage (%)
		PI 17	Share of mortalities disposed through composting						Percentage (%)
		PI 18	Share of mortalities disposed through incineration and/or landfilling						Percentage (%)
		PI 19	Share of spent hens valorized through human consumption						Percentage (%)
		PI 20	Share of spent hens valorized through rendering						Percentage (%)
		PI 21	Share of spent hens disposed through composting						Percentage (%)
		PI 22	Share of spent hens disposed through incineration and/or landfilling						Percentage (%)
		PI 23	Share of manure used for soil fertilization						Percentage (%)
		PI 24	Manure management strategies						Indicator of Good Practices (IgP)
	COHERENCE PANEL
	CE Objectives	CO 4	Maximize rates of materials reuse, recycling and recovery		**	**	**	**	**	**	**	**	**	**	**
		CO 5	Prevent waste production	**	**	**	**	**	**	**	**	**	**	**	**
		CO 6	Eliminate and dispose waste in such a way that they don't endanger human health and ecosystems				**	**	**	**	**	**	**	**	**
		CO 7	Minimize food waste	*	**	**	**	**	**	**	**	**	**	**	**
		Performance Indicators		PI 13	PI 14	PI 15	PI 16	PI 17	PI 18	PI 19	PI 20	PI 21	PI 22	PI 23	PI 24
	Decesion Variable	DV 1	Reduction and disposition of mortalities	**			**	**	**
		DV 2	Spent hens’ valorization							**	**	**	**
		DV 3	Reduction and disposition of downgraded eggs		**	**
		DV 4	Manure production and management											**	**
		DV 5	Hens’ productivity	*
		DV 6	Feed utilization
		DV 7	Water use/consumption
		DV 8	Use of prodution equipt & other disposables
		DV 9	Energy use												*
		DV 10	Use of renewable energy
		DV 11	Greenhouse gas emissions				*	*	*	*	*	*	*	*	*
		DV 12	Occupational health and safety
		DV 13	Local employment and wealth
		DV 14	Animal welfare												*
	LEGEND
		CECA:	Category of Economic Circularity Assessment			DV :	Decision Variable
		CO :	Circularity Obejctive (For the level of Decision Centres)			DC.:	Decision Centre
		** :	Strong link * : Weak link			Blank box :			No link

## Sheet: S1-b_Coherence_CECA 3 & CECA4
	CECAs:		ENVIRONMENT (ENERGY & EMISSIONS)
			COMPLEMENTARY INDICATORS (Social & Biodiversity)
		Performance indicators developed for theses CECAs									Unit of Measurement
		PI 25	Share of the total energy used which is from renewable sources								Percentage (%)
		PI 26	Total annual distance (in km) done for inputs supply								In Kilometers (Km)
		PI 27	Total annual distance (in km) done for products and by-products delivery								In Kilometers (Km)
		PI 28	What practices the company puts in place to avoid eutrophication and water pollution, and to control the air quality in its direct environment								Indicator of Good Practices (IgP)
		PI 29	Personnel who are protected from exposure to airborne particulate matter concentrations and endotoxins								Percentage (%)
		PI 30	Staff who are fully protected against ergonomic issues								Percentage (%)
		PI 31	Staff seniority rate								Percentage (%)
		PI 32	Percentage of employees installed locally								Percentage (%)
		PI 33	The company gives priority to local suppliers (when possible)								Percentage (%)
		PI 34	% of animals living with good health status with no use of drugs and other curative treatments (annual basis)								Percentage (%)
		PI 35	% of animals kept with possibility to exhibit their natural behaviors throughout their life cycle (annual basis)								Percentage (%)
		PI 36	% of animals living without pain, discomfort or stress throughout their life, including during transport and the slaughter process (annual basis)								Percentage (%)
	COHERENCE PANEL
	CE Objectives	CO 1	Minimize global energy consumption	**
		CO 2	Reduce water consumption and use
		CO 8	Maximize the use of renewable (sustainable) energy	**
		CO 9	Contain GHG emissions	*	**	**	**
		CO 10	Prevent emissions of pollutants and air contaminants	*	**	**	**
		CO 11	Eliminate ozone-depleting substances		*	*	**
		CO 12	Ensure a decent work environment (sanitary facilities, safe and ergonomic work environment, etc.)					**	**	*
		CO 13	Support local economy through employment and added value creation					*	*	**	**	**
		CO 14	Protect animals from hunger, thirst, injury and disease										**	*	*
		CO 15	Keep animals in conditions adapted to their species and without discomfort, pain, fear and distress										*	**	**
		Performance Indicators		PI 25	PI 26	PI 27	PI 28	PI 29	PI 30	PI 31	PI 32	PI 33	PI 34	PI 35	PI 36
	Decesion Variable	DV 1	Reduction and disposition of mortalities
		DV 2	Spent hens’ valorization
		DV 3	Reduction and disposition of downgraded eggs
		DV 4	Manure production and management
		DV 5	Hens’ productivity
		DV 6	Feed utilization
		DV 7	Water use/consumption
		DV 8	Use of prodution equipt & other disposables
		DV 9	Energy use		**	**
		DV 10	Use of renewable energy	**
		DV 11	Greenhouse gas emissions	*	**	**	**
		DV 12	Occupational health and safety					**	**	*	*
		DV 13	Local employment and wealth							**	**	**
		DV 14	Animal welfare										**	**	**
	LEGEND
		CECA:	Category of Economic Circularity Assessment			DV :	Decision Variable
		CO :	Circularity Obejctive (For the level of Decision Centres)			DC.:	Decision Centre
		** :	Strong link * : Weak link			Blank box :			No link
